# Supplementary material for: Attenuation of Oxidative Stress and Inflammatory Response by Chronic Cannabidiol Administration Is Associated with Improved n-6/n-3 PUFA Ratio in the White and Red Skeletal Muscle in a Rat Model of High-Fat Diet-Induced Obesity
Source: Nutrients. 2021 May 11;13(5):1603. doi: 10.3390/nu13051603 (PMC8151284; doi:10.3390/nu13051603)

Loading order in all Western blots: Control, HFD, CBD, HFD+CBD.

On the left are stain-free gels showing the total protein loading used for normalization.

On the right are corresponding membranes with the detected proteins.

### White skeletal muscle

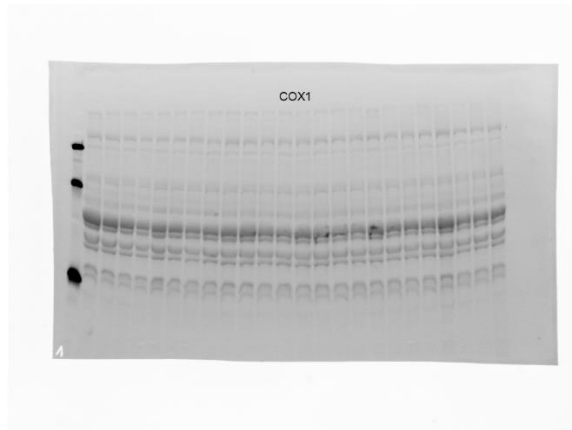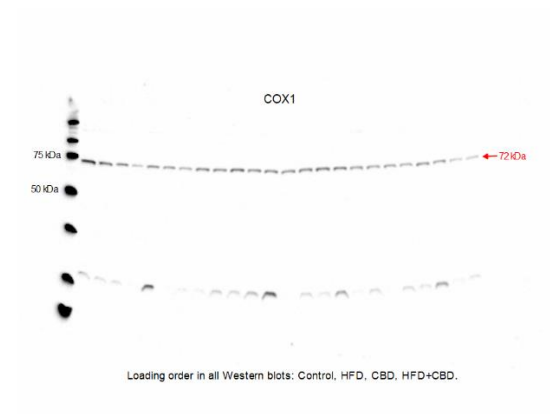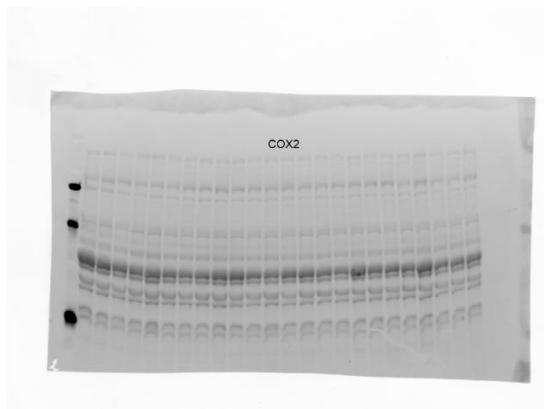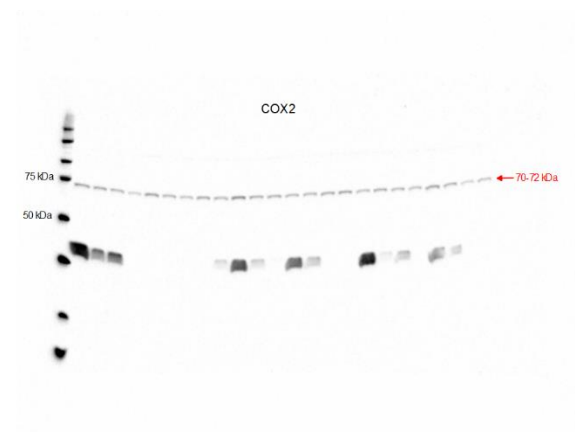

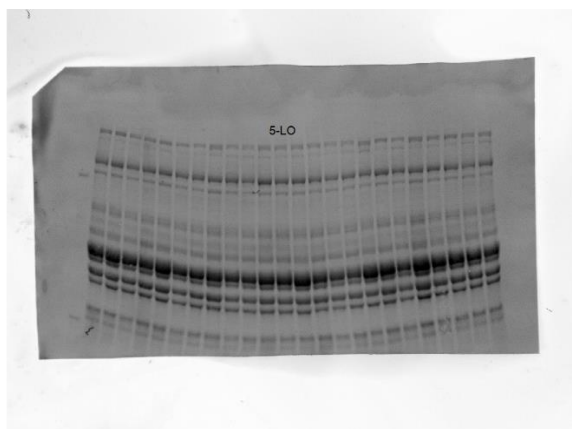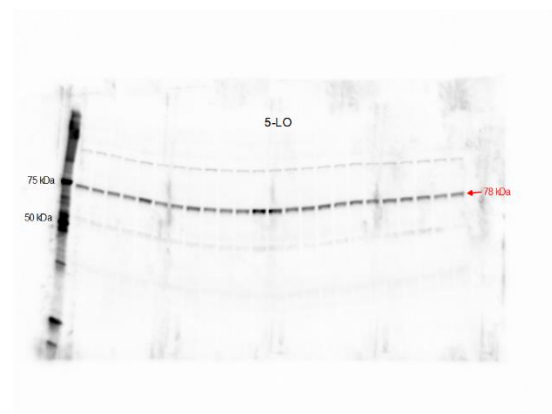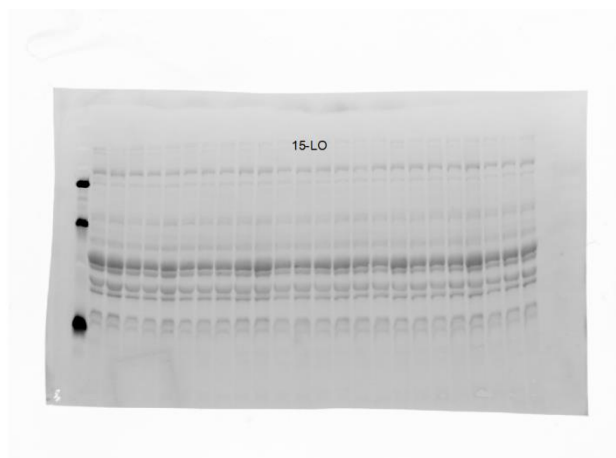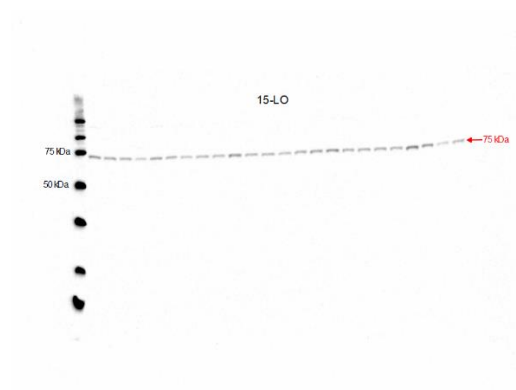

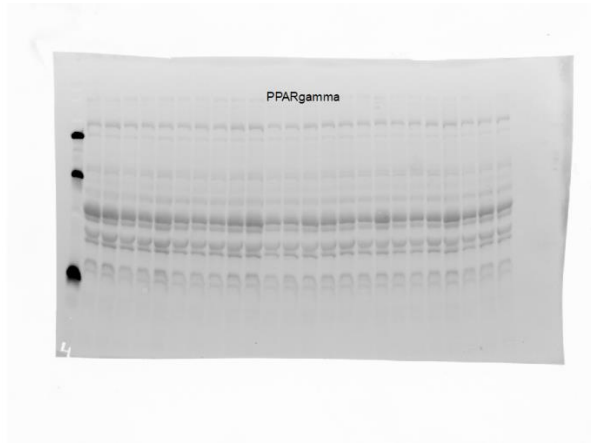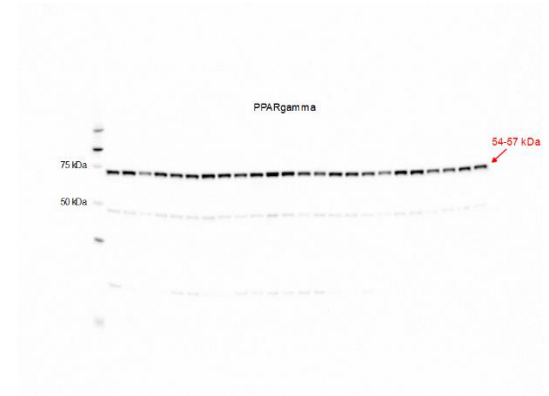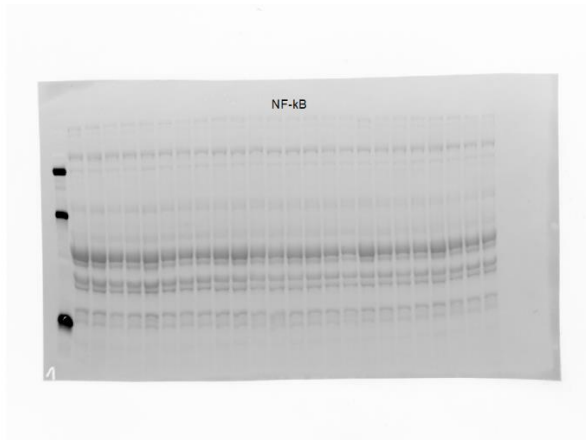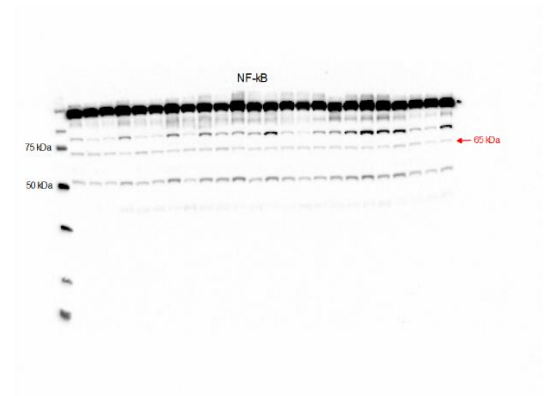

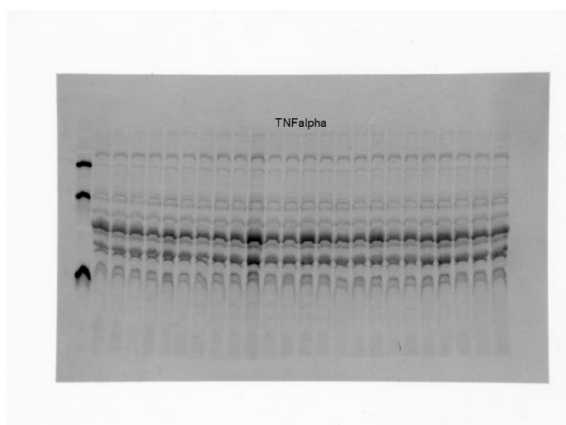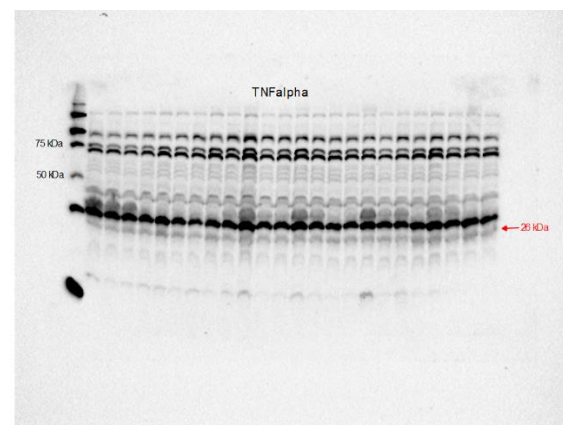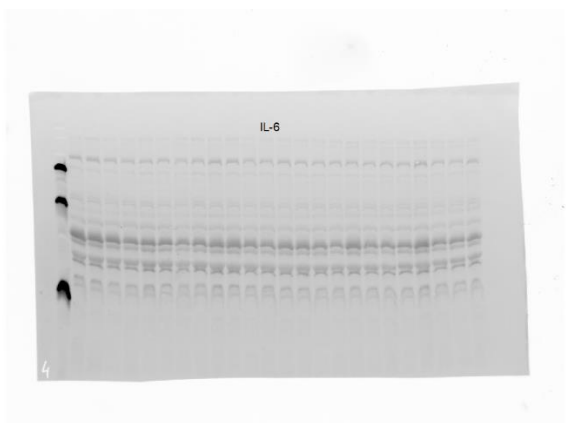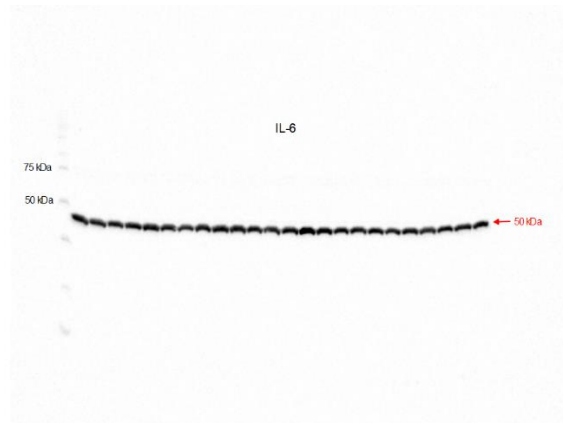

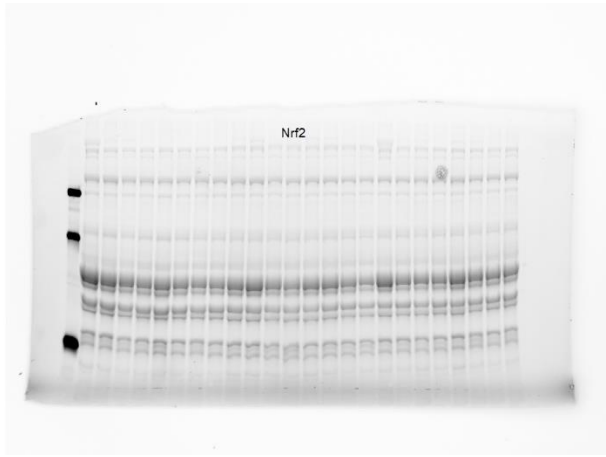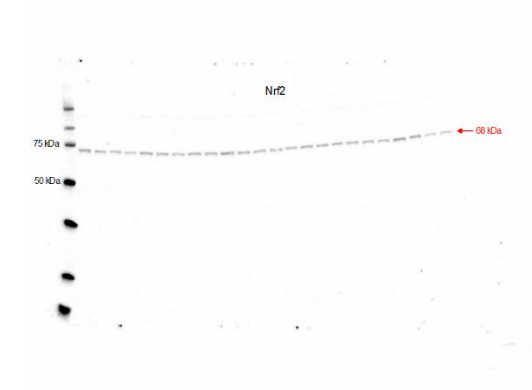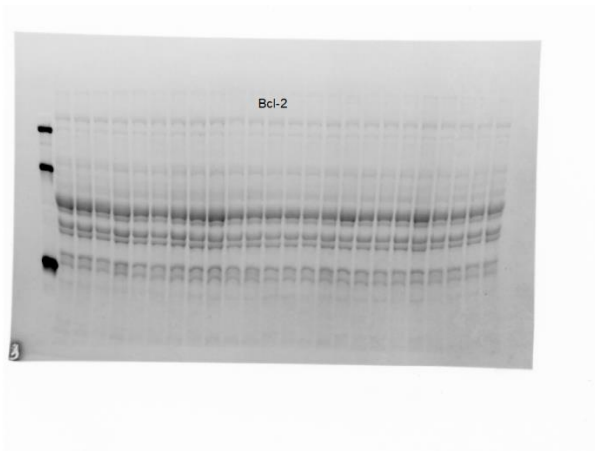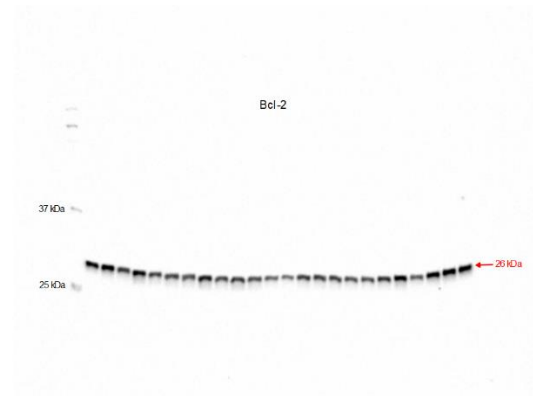

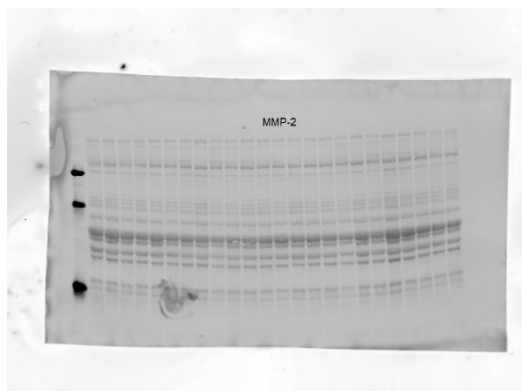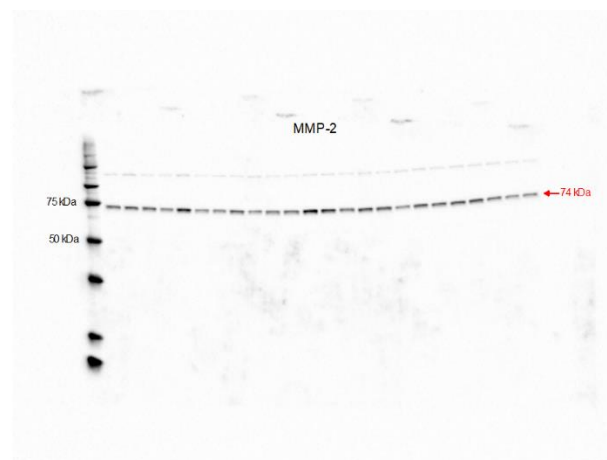

|

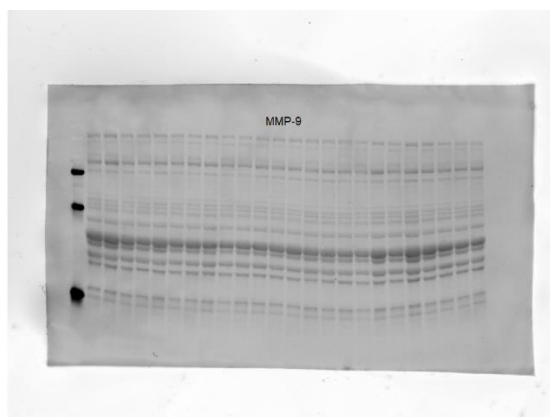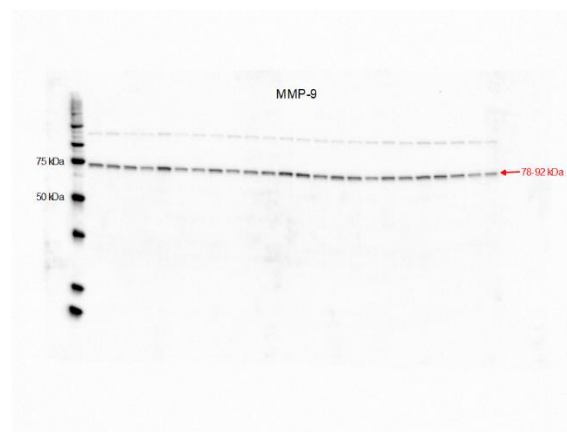

## Red skeletal muscle

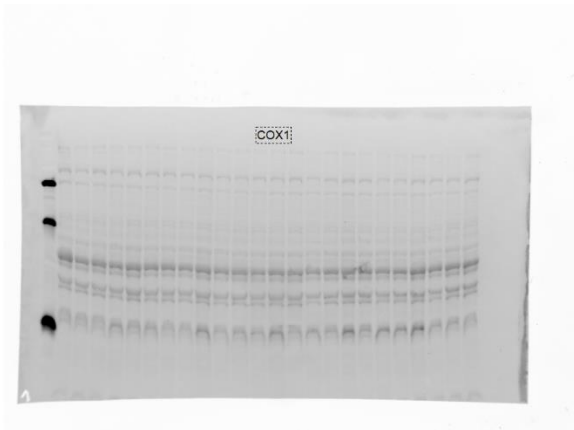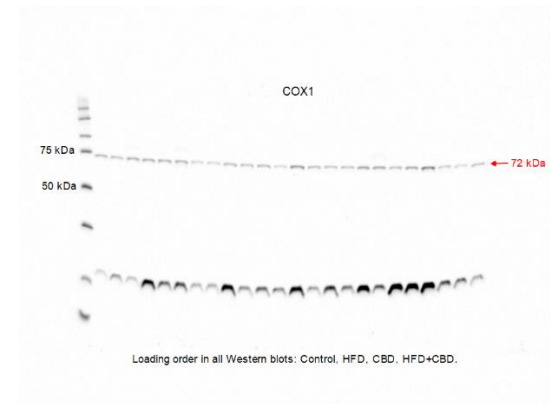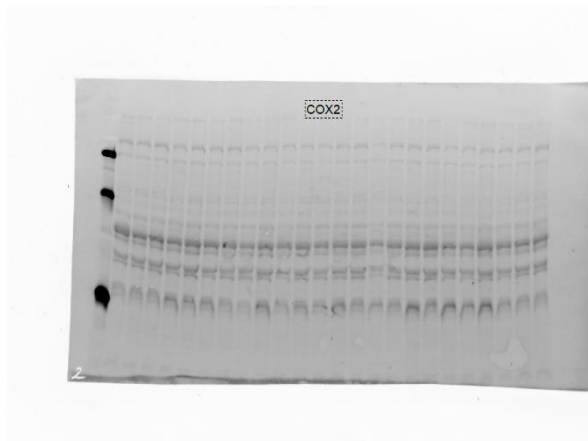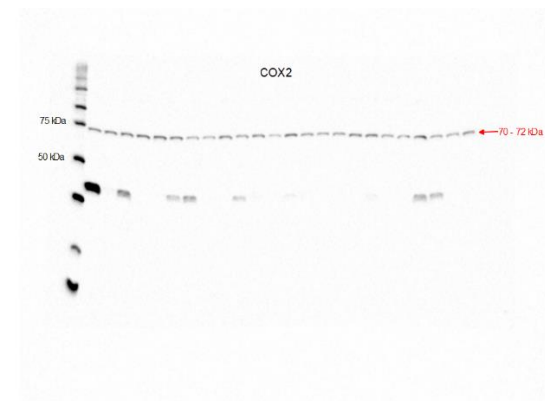

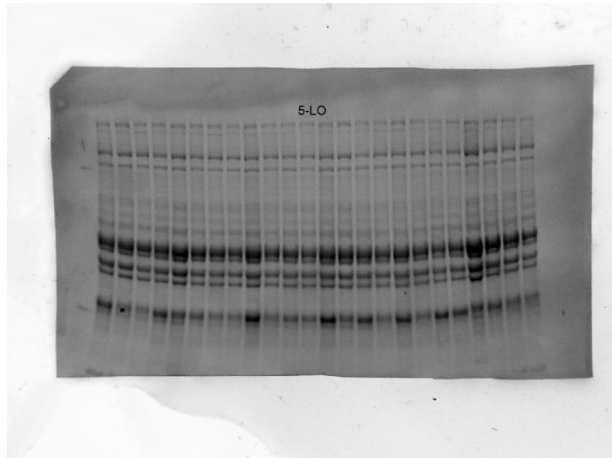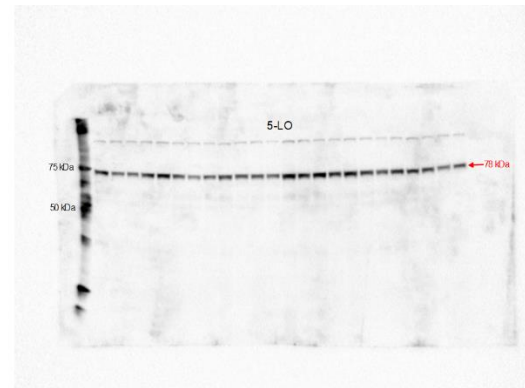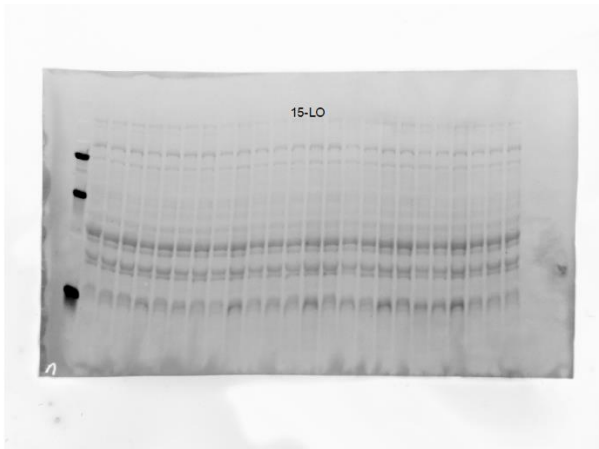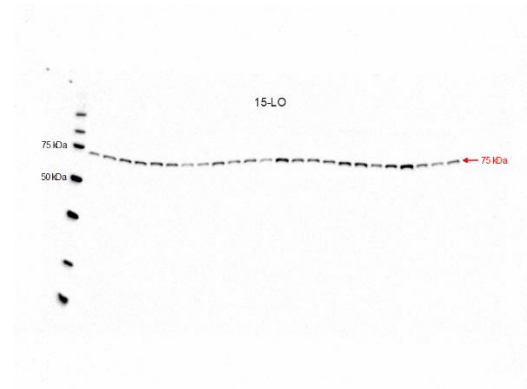

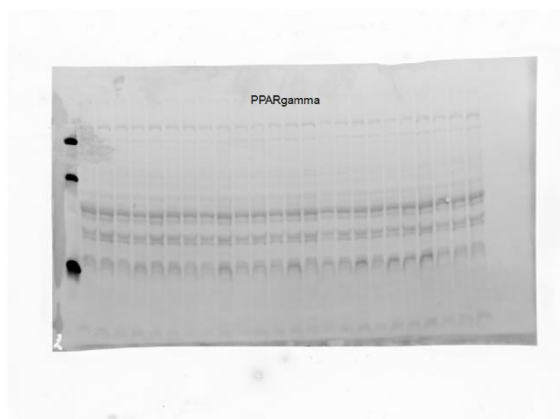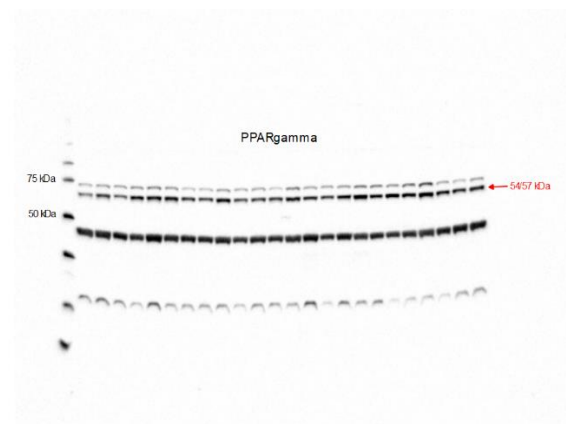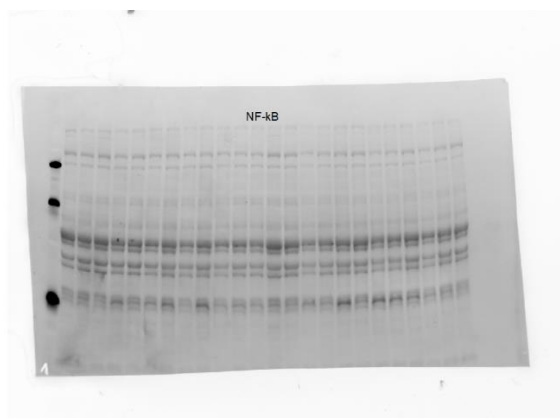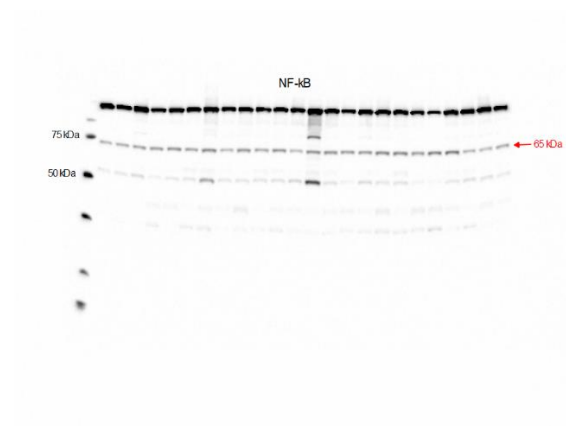

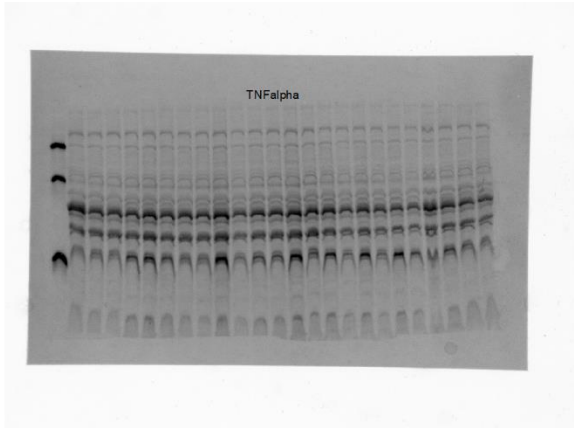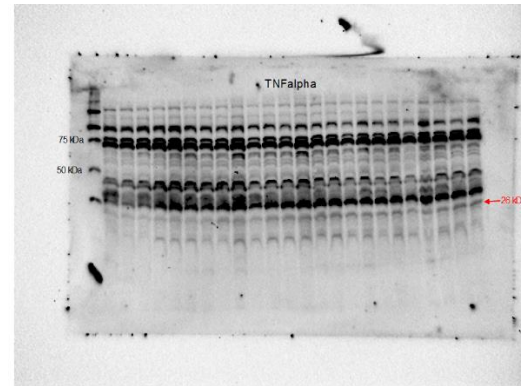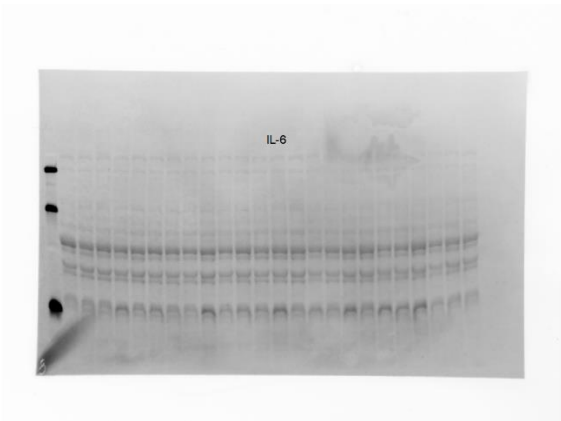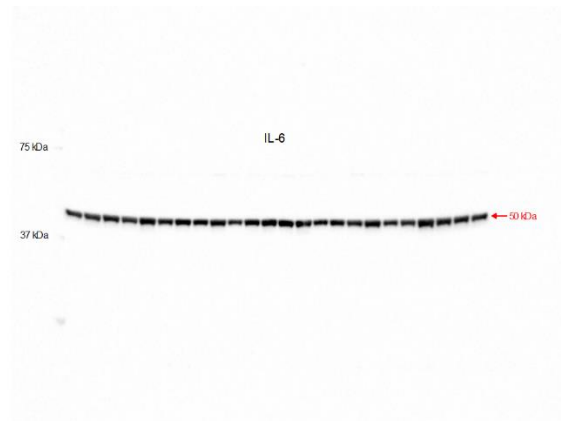

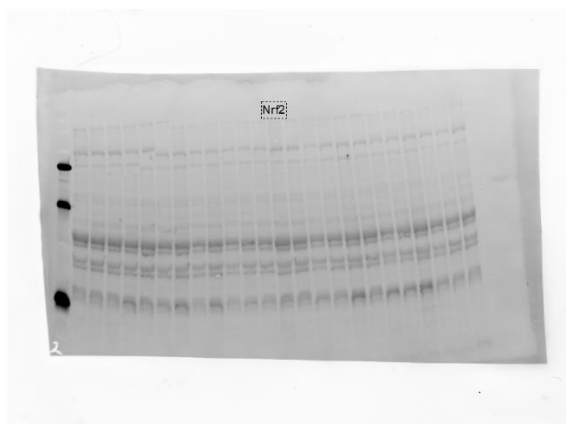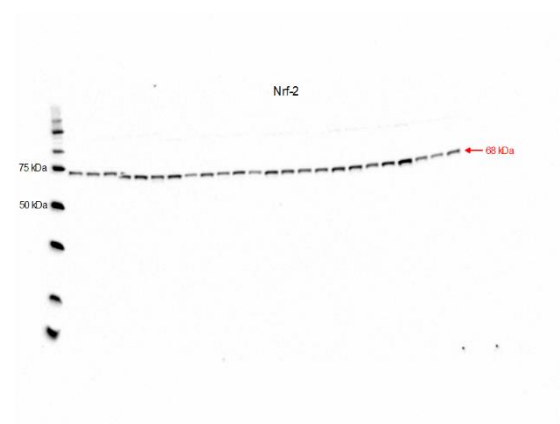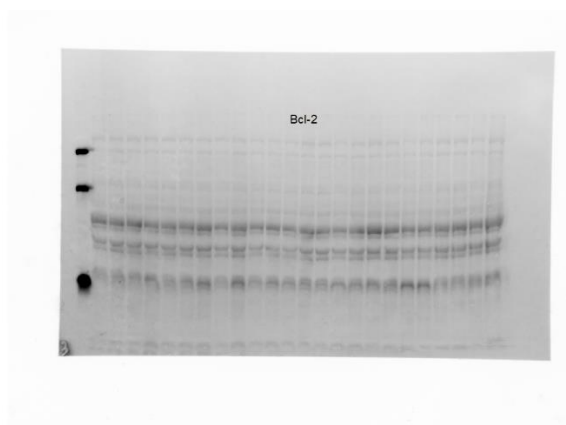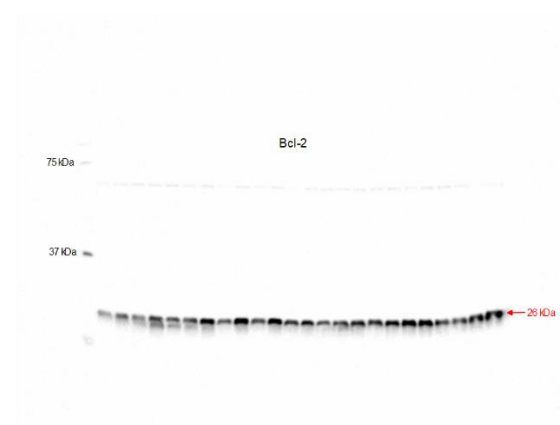

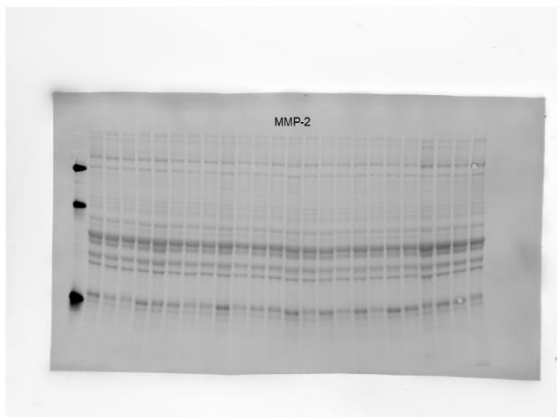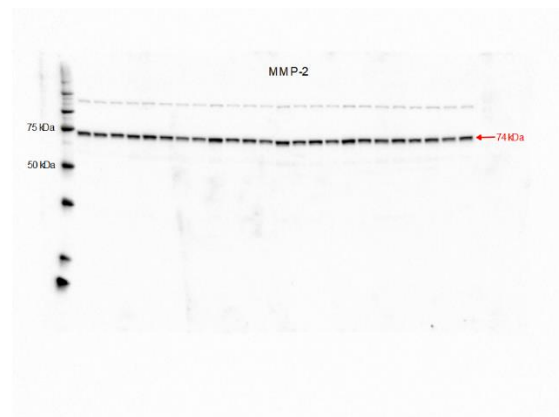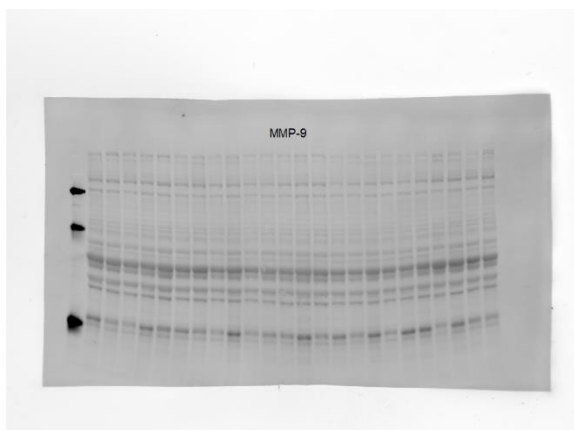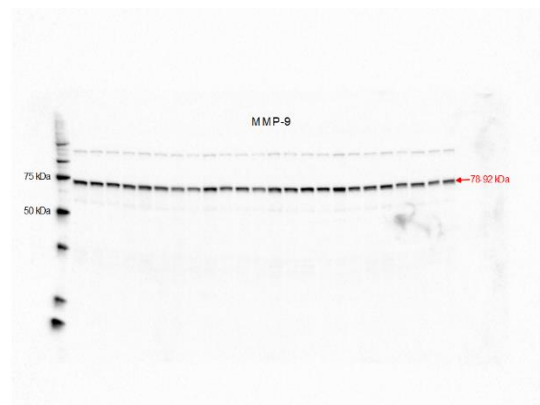

Supplement: Supplementary file 1 [file nutrients-13-01603-s001.zip › nutrients-1177769-SI.pdf]
